# Supplementary material for: Molecular detection of Borrelia burgdorferi (sensu lato) and Rickettsia spp. in hard ticks distributed in Tokachi District, eastern Hokkaido, Japan
Source: PubMed Central journal article supplement (PMC8906132; doi:10.1016/j.crpvbd.2021.100059), 2021-11-11

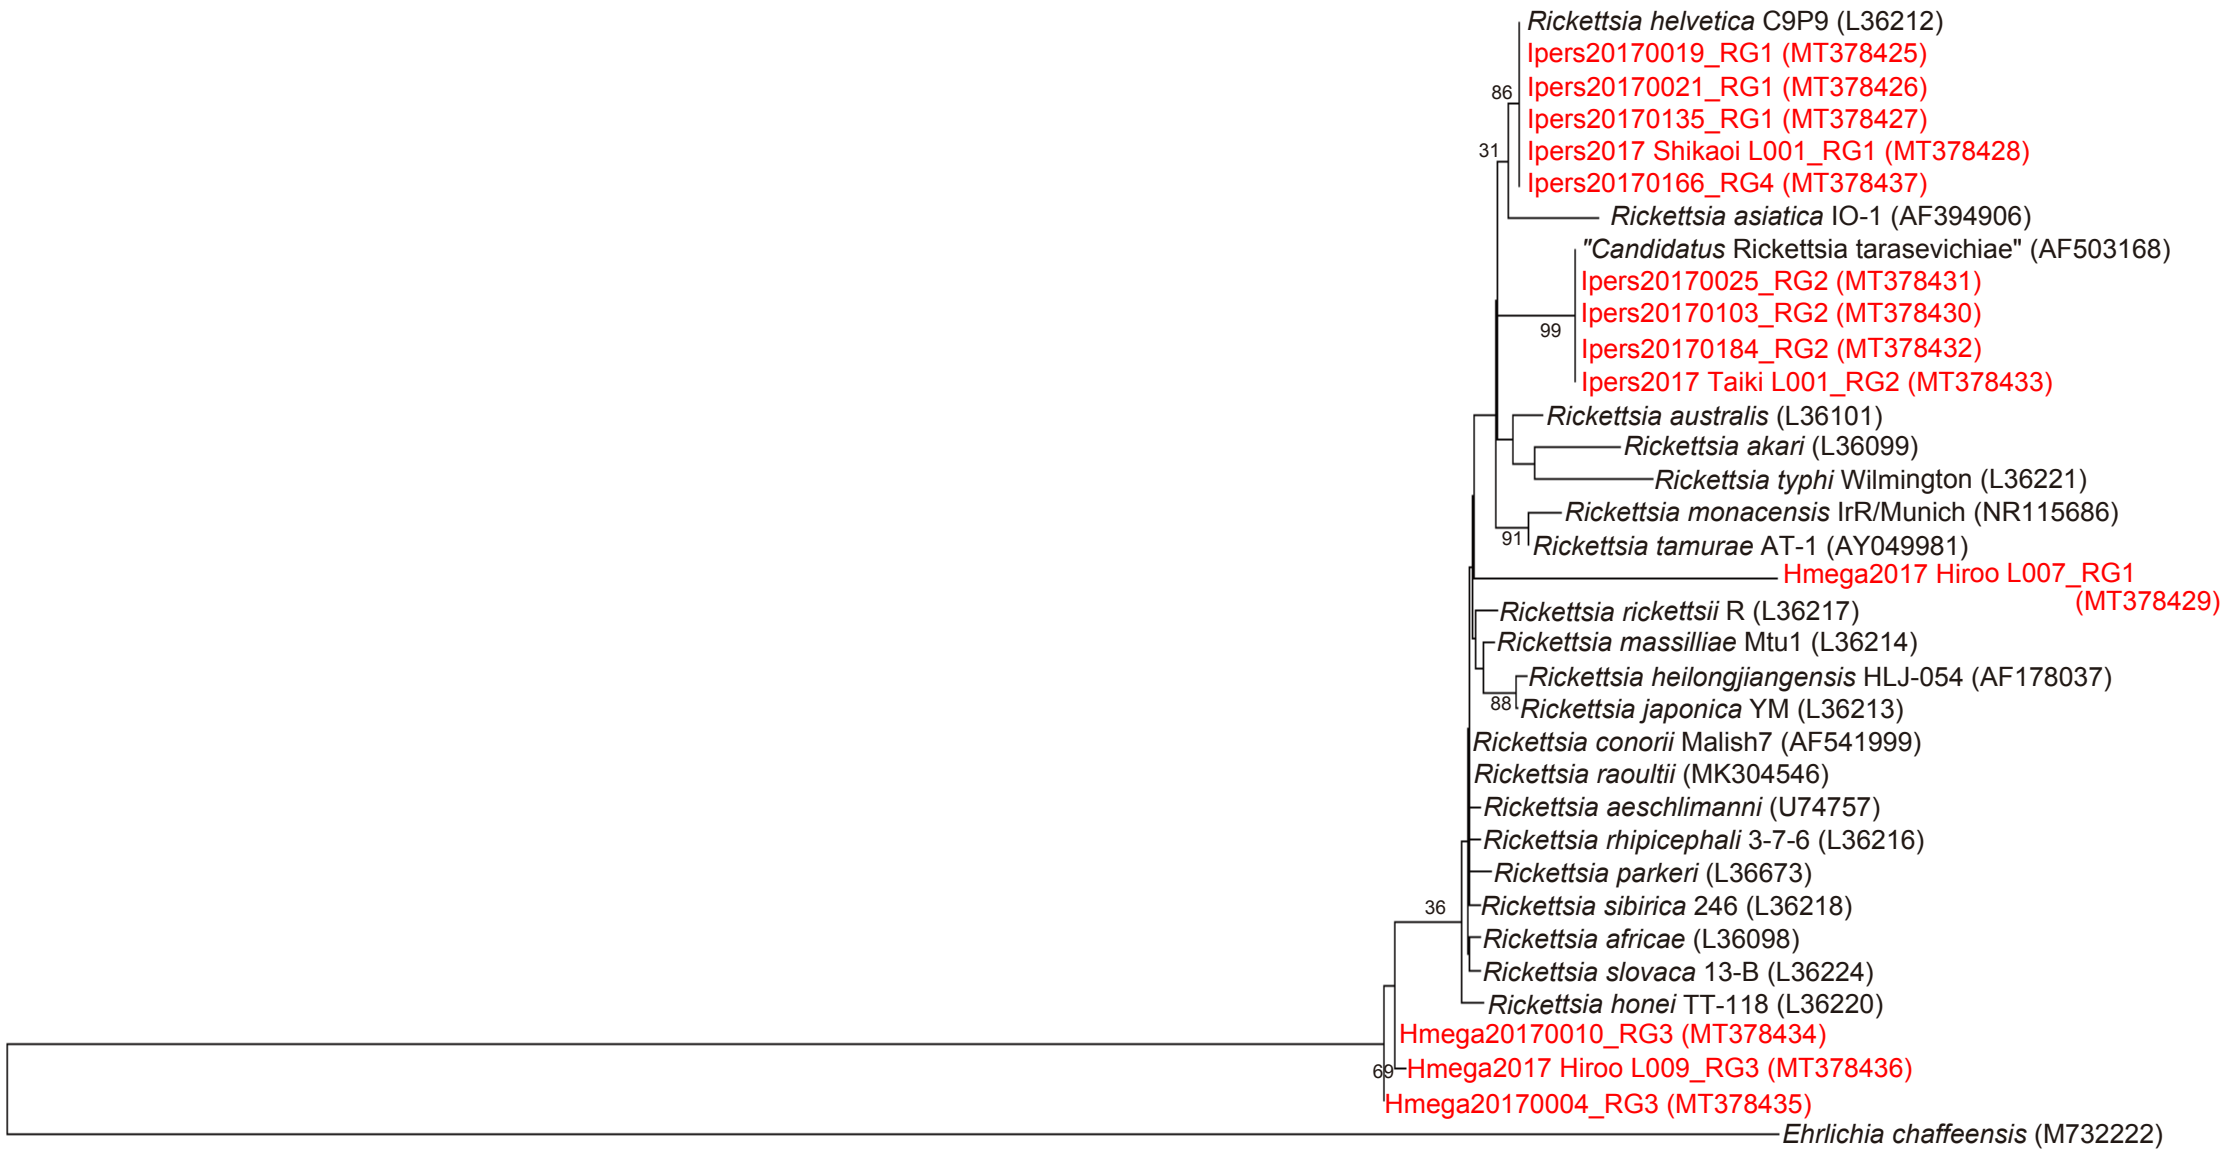

Supplement: mmc1.pdf [file mmc1.pdf]
