# Supplementary material for: Molecular detection of Borrelia burgdorferi (sensu lato) and Rickettsia spp. in hard ticks distributed in Tokachi District, eastern Hokkaido, Japan
Source: PubMed Central journal article supplement (PMC8906132; doi:10.1016/j.crpvbd.2021.100059), 2021-11-11
Supplement: mmc3.pdf [file mmc3.pdf]

**Supplementary Table S1.** Tick species distribution and prevalence of *Borrelia burgdorferi* (s.l.) and *Rickettsia* spp. among questing ticks collected in Tokachi district, eastern Hokkaido, Japan. (continued)

| Month | Province | Species               | Stage <sup>a</sup> | Total No. <sup>b</sup> | Tested <sup>c</sup><br>(No. pool) | <i>Borrelia burgdorferi</i> (s.l.) (%) |                    |              | <i>Rickettsia</i> spp. (%) |                      |                      |
|-------|----------|-----------------------|--------------------|------------------------|-----------------------------------|----------------------------------------|--------------------|--------------|----------------------------|----------------------|----------------------|
|       |          |                       |                    |                        |                                   | <i>B. j.</i>                           | <i>B. g./B. b.</i> | <i>B. a.</i> | <i>R. h.</i>               | " <i>Ca. R. t.</i> " | " <i>Ca. R. p.</i> " |
| Oct   | Shikaoi  | <i>I. persulcatus</i> | Male               | 1                      | 0                                 | –                                      | –                  | –            | –                          | –                    | –                    |
|       |          |                       | Nymph              | 1                      | 0                                 | –                                      | –                  | –            | –                          | –                    | –                    |
|       |          | <i>H. megaspinoso</i> | Male               | 1                      | 0                                 | –                                      | –                  | –            | –                          | –                    | –                    |
|       |          |                       | Nymph              | 3                      | 0                                 | –                                      | –                  | –            | –                          | –                    | –                    |
|       |          | <i>H. japonica</i>    | Male               | 1                      | 0                                 | –                                      | –                  | –            | –                          | –                    | –                    |
|       |          |                       | Female             | 1                      | 0                                 | –                                      | –                  | –            | –                          | –                    | –                    |
|       |          | Nymph                 | 2                  | 0                      | –                                 | –                                      | –                  | –            | –                          | –                    |                      |
| Nov   | Ashoro   | <i>I. ovatus</i>      | Female             | 3                      | 3                                 | 1 (33)                                 | 0 (0)              | 0 (0)        | 0 (0)                      | 0 (0)                | 0 (0)                |
|       |          |                       | Larva              | 6                      | 1                                 | 0 (0)                                  | 0 (0)              | 0 (0)        | 0 (0)                      | 0 (0)                | 0 (0)                |
|       |          | <i>I. persulcatus</i> | Nymph              | 2                      | 0                                 | –                                      | –                  | –            | –                          | –                    | –                    |
|       |          |                       | Larva              | 15                     | 9 (2)                             | 0 (0)                                  | 0 (0)              | 0 (0)        | 1 (50)                     | 1 (50)               | 0 (0)                |
|       |          | <i>H. japonica</i>    | Male               | 3                      | 3                                 | 0 (0)                                  | 0 (0)              | 0 (0)        | 0 (0)                      | 0 (0)                | 0 (0)                |
|       |          |                       | Nymph              | 109                    | 4                                 | 0 (0)                                  | 0 (0)              | 0 (0)        | 0 (0)                      | 0 (0)                | 0 (0)                |
|       |          | <i>H. megaspinoso</i> | Nymph              | 10                     | 1                                 | 0 (0)                                  | 0 (0)              | 0 (0)        | 0 (0)                      | 0 (0)                | 0 (0)                |
|       |          |                       | Larva              | 39                     | 10 (2)                            | 0 (0)                                  | 0 (0)              | 0 (0)        | 0 (0)                      | 0 (0)                | 0 (0)                |

<sup>a</sup>Developmental stages of ticks collected.

<sup>b</sup>Total number of ticks collected.

<sup>c</sup>Number of ticks tested for microorganism detection.

Abbreviations: *B. a.*, *Borrelia afzelii*; *B. b.*, *Borrelia bavariensis*; *B. g.*, *Borrelia garinii*; *B. j.*, *Borrelia japonica*; "*Ca. R. p.*", "*Candidatus Rickettsia principis*"; "*Ca. R. t.*", "*Candidatus Rickettsia tarasevichiae*"; *R. h.*, *Rickettsia helvetica*; 0 (0), the tick samples tested were all negative for the microorganism. Hyphens indicate that no tick sample was tested.
